# Supplementary material
Source: PubMed Central journal article supplement (PMC7159301)
Supplement: mmc1.pdf [file mmc1.pdf]

# THE LANCET

## **Supplementary appendix**

This appendix formed part of the original submission and has been peer reviewed. We post it as supplied by the authors.

Supplement to: Fooks AR, Banyard AC, Horton DL, et al. Current status of rabies and prospects for elimination. *Lancet* 2014; published online May 12. [http://dx.doi.org/10.1016/S0140-6736\(13\)62707-5](http://dx.doi.org/10.1016/S0140-6736(13)62707-5).

| Species       | Phylogroup | Virus                                   | Distribution              | Species                                           | Human deaths        |
|---------------|------------|-----------------------------------------|---------------------------|---------------------------------------------------|---------------------|
| 1             | 1          | Classical Rabies Virus (RABV)           | Worldwide                 | Wide range of mammals                             | Approx. 60,000 p.a. |
| 2             | 2          | Lagos Bat Virus (LBV)                   | Africa                    | Fruit bat, dog and cat                            | Unknown             |
| 3             | 2          | Mokola Virus (MOKV)                     | Africa                    | Shrew, cat, dog, rodent and human                 | 2                   |
| 4             | 1          | Duvenhage Virus (DUVV)                  | Africa                    | Insectivorous bat and human                       | 3                   |
| 5             | 1          | European Bat Lyssavirus Type-1 (EBLV-1) | Europe                    | Insectivorous bat, sheep , stone marten and human | 2                   |
| 6             | 1          | European Bat Lyssavirus Type-2 (EBLV-2) | Europe                    | Insectivorous bat and human                       | 2                   |
| 7             | 1          | Australian Bat Lyssavirus (ABLV)        | Australia                 | Fruit and insectivorous bat, and human            | 3                   |
| 8             | 1          | Aravan Virus (ARAV)                     | Eurasia                   | Insectivorous bat                                 | Unknown             |
| 9             | 1          | Khujand Virus (KHUV)                    | Eurasia                   | Insectivorous bat                                 | Unknown             |
| 10            | 1          | Irkut Virus (IRKV)                      | Eurasia, Far East (China) | Insectivorous bat                                 | 1                   |
| 11            | 3          | West Caucasian Bat Virus (WCBV)         | Eurasia                   | Insectivorous bat                                 | Unknown             |
| 12            | 2          | Shimoni Bat Virus (SHIBV)               | Africa                    | Insectivorous bat                                 | Unknown             |
| Unclassified  | 1?         | Bokeloh Bat Virus (BBLV)                | Europe (Germany, France)  | Insectivorous bat                                 | Unknown             |
| Unclassified  | 3?         | Ikoma lyssavirus (IKOV)                 | Africa (Tanzania)         | African civet                                     | Unknown             |
| Unclassified* | ?          | Lleida Bat Lyssavirus                   | Europe (Spain)            | Insectivorous bat                                 | Unknown             |

**Appendix Table: Classification of the lyssaviruses.** 12 classified and 2 proposed lyssavirus species (ICTV 2011)<sup>15</sup>. \*Lleida bat lyssavirus reported but not yet proposed to ICTV<sup>16</sup>.

[Click here to download high resolution image](#)

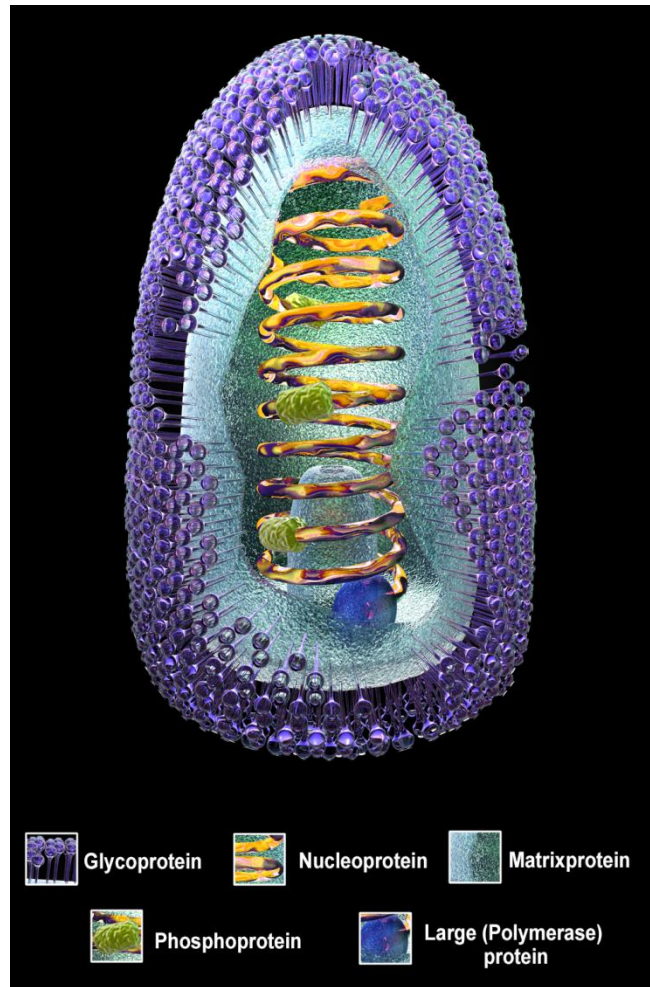

**Appendix Figure 1** – Graphic of rabies virion (reproduced courtesy of ResearchGraphix).

[Click here to download high resolution image](#)

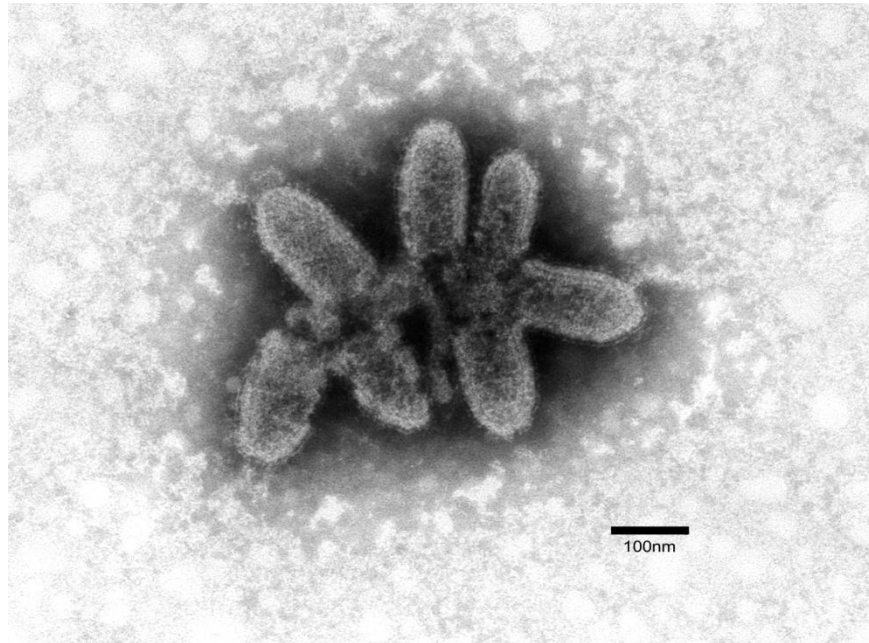

**Appendix Figure 2** – Electron microscope image of rabies virus (reproduced courtesy of Bill Cooley AHVLA).

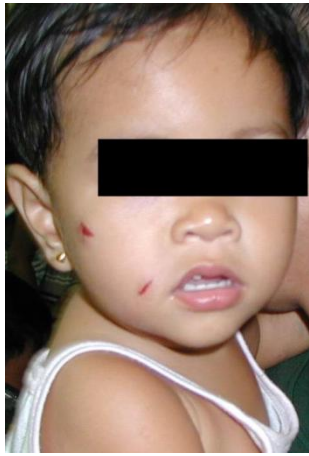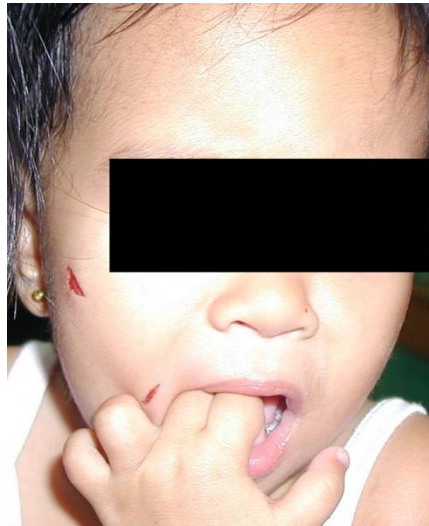

**Appendix Figure 3** – Images of a WHO category III exposure dog bite to the face (reproduced courtesy of Rabies Free World).

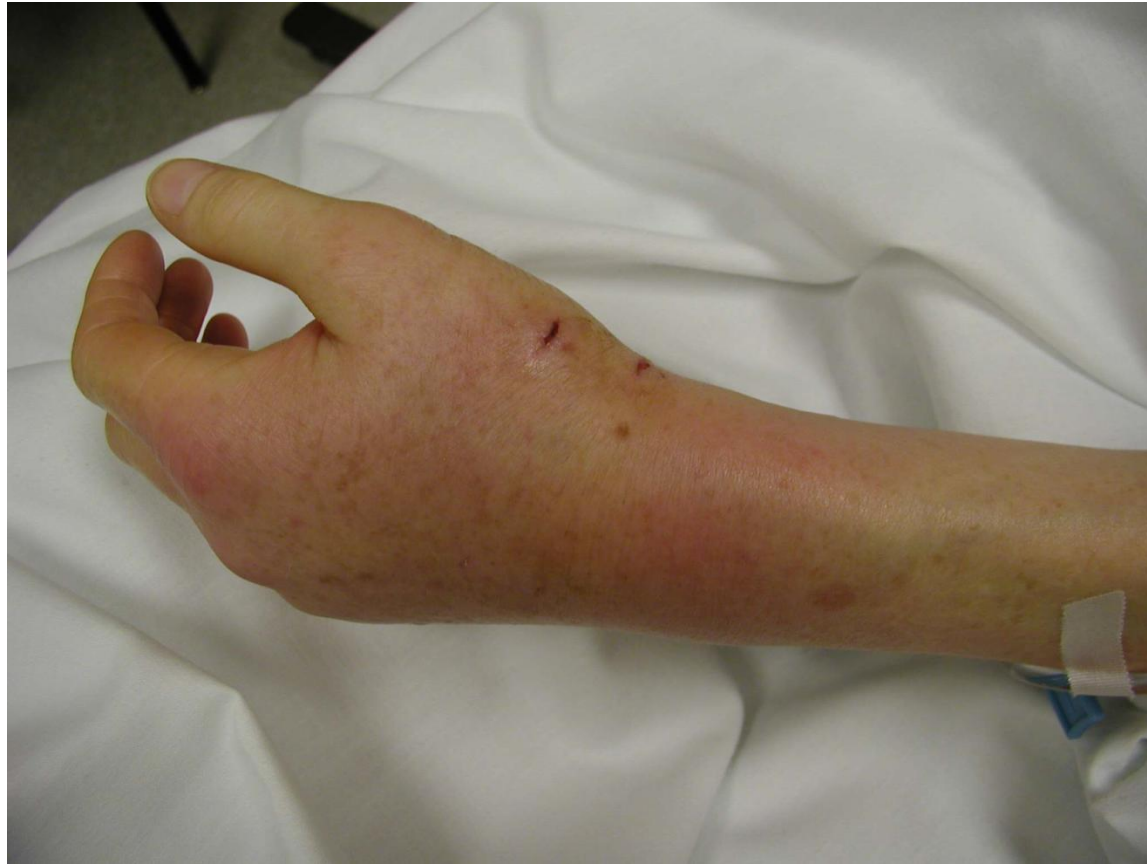

**Appendix Figure 4** – Image of a cat bite to the hand (reproduced courtesy of Rabies Free World).
